## OTHER BOOKS RECEIVED

- La abolición de la esclavitud en Norteamérica.* By HEBE CLEMENTI. Buenos Aires, 1975. Editorial La Pléyade. Tables. Pp. 222. Paper.
- The Ancient Spaniards.* By GERARD NICOLINI. Translated by JEAN STEWART. Letchworth, Hertfordshire, England, 1974. Saxon House. Illustrations. Plates. Maps. Bibliography. Index. Pp. xv, 231. Cloth. £5.50.
- Anuario*, Tomo I, Año 1974. INSTITUTO DE ESTUDIOS HISPANOAMERICANOS. Caracas, 1975. Facultad de Humanidades y Educación de la Universidad Central de Venezuela. Pp. 204. Paper.
- Aspects of Soviet Policy toward Latin America.* By T. STEPHEN CHESTON and BERNARD LOEFFKE. New York, 1974. MSS Information Corporation. Illustrations. Tables. Maps. Pp. 147. Cloth. \$11.00. Paper \$3.75.
- Os balões de observação da guerra do Paraguai.* By NELSON FREIRE LAVENERE-WANDERLEY. Rio de Janeiro, 1974. Instituto Histórico e Geográfico Brasileiro. Pp. 38. Paper.
- Beiträge zur Völker—Und Spranchenkunde, Archäologie und Anthropologie des Indianischen Amerika.* Berlin, 1974. Gbr. Mann Verlag. Illustrations. Maps. Tables. Pp. 297. Paper.
- La capacidad política de la clase obrera.* By PEDRO J. PROUDHON. Introduction by PIERRE ANSART. Buenos Aires, 1974. Editorial Proyección. Pp. 209. Paper.
- Cartagena de Indias, gran factoria de mano de obra esclava.* By JORGE PALACIOS PRECIADO. Tunja, Colombia, 1975. Ediciones "Pato Marino." Map. Pp. 31. Paper.
- Charles A. Beard and American Foreign Policy.* By THOMAS C. KENNEDY. Gainesville, 1975. The University Presses of Florida. Appendix. Bibliography. Index. Pp. xi, 199. Cloth. \$8.50
- Communion in Solitude: Mexico from the Corner of an Eye.* By MICHAEL BRADLEY. San Francisco, 1975. The Scrimshaw Press. Color Photographs. Pp. 95. Cloth. \$16.95.
- Developmental Human Behavior Genetics.* By K. WARNER SCHAE, V. ELVING ANDERSON, GERALD E. MCCLEARN, and JOHN MONEY. Lexington, Mass., 1975. Lexington Books. Tables. Charts. Illustrations. Glossary. Indexes. Pp. ix, 248. Cloth.
- Eloísa está debajo de un almendro. Las cinco advertencias de Satanás.* By ENRIQUE JARDIEL PONCELA. Madrid, 1974. Espasa-Calpe, S. A. Pp. 244. Paper.
- Escritos pedagógicos.* By MANUEL GARCÍA MORENTE. Madrid, 1975. Espasa-Calpe, S. A. Pp. 239. Paper.

- Études offertes à Jacques Lambert.* By CENTRE NATIONAL DE LA RECHERCHE SCIENTIFIQUE. Paris, 1975. Editions Cujas. Pp. xi, 709.
- Factores que afectaron la producción agropecuaria en la sabana de Bogotá en la época colonial.* By JUAN A. VILLAMARIN. Tunja, Colombia, 1975. Ediciones "Pato Marino." Bibliography. Tables. Pp. 27. Paper.
- Foreign Relations of the United States, 1948. Volume I: General, the United Nations.* By the DEPARTMENT OF STATE. Preface by WILLIAM M. FRANKLIN. Washington, 1975. U.S. Government Printing Office. Index. Pp. xvi, 505, xv. Cloth. \$8.10.
- Foreign Relations of the United States, 1948. Volume V: The Near East, South Asia, and Africa. Part I.* By the DEPARTMENT OF STATE. Preface by WILLIAM M. FRANKLIN. Washington, 1975. U.S. Government Printing Office. Index. Pp. x, 532, xv. Cloth. \$8.25.
- Foreign Relations of the United States, 1949. Volume IV: Western Europe.* By the DEPARTMENT OF STATE. Preface by WILLIAM M. FRANKLIN. Washington, 1975. U.S. Government Printing Office. Index. Pp. x, 878. Cloth. \$11.15.
- Foreign Relations of the United States, 1949. Volume VII: The Far East and Australasia. Part I.* By the DEPARTMENT OF STATE. Preface by WILLIAM M. FRANKLIN. U.S. Government Printing Office. Index. Pp. x, 600. Cloth. \$8.75.
- Historiografía y bibliografía de la emancipación del nuevo reino de Granada.* By JAVIER OCAMPO LÓPEZ. Tunja, Colombia, 1969. Universidad Pedagógica y Tecnológica de Colombia. Bibliography. Index. Pp. 555. Paper.
- La industria del petróleo en Colombia: síntesis de su proceso histórico.* By DIEGO MONTAÑA CUELLAR. Tunja, Colombia, 1975. Ediciones "Pato Marino." Pp. 19. Paper.
- Industrial Revolution in Mexico.* By SANFORD A. MOSK. Reprint, New York, 1975. Russell & Russell. Map. Tables. Appendix. Index. Pp. x, 331. Cloth.
- Inquietudes y meditaciones.* By MIGUEL DE UNAMUNO. Madrid, 1975. Espasa-Calpe, S. A. Pp. 140. Paper.
- Latin America: It's Peoples and Institutions.* By JOSEPH A. ELLIS. 2nd ed. Beverly Hills, 1975. Glencoe Press. Maps. Illustrations. Bibliography. Index. Pp. xv, 300. Paper. \$5.95.
- Malatesta: Pensamiento y acción revolucionarios.* Compiled by VERNON RICHARDS. Buenos Aires, 1974. Editorial Proyección. Pp. 354. Paper.
- Marines in the Dominican Republic, 1916-1924.* By STEPHEN FULLER, and GRAHAM A. COSMAS. Foreword by E. H. SIMMONS. Washington, 1974. U.S. Government Printing Office. Maps. Illustrations. Tables. Appendices. Pp. vii, 109. Paper. \$1.90.
- La medicina del siglo XVIII en el nuevo reino de Granada.* By ANTONIO MARTÍNEZ ZULAICA. Tunja, Colombia, 1973. Universidad Pedagógica y Tecnológica de Colombia. Bibliography. Pp. 318. Paper.

- Nacionalismo y educación en México.* By JOSEFINA VÁZQUEZ DE KNAUTH. 2nd ed. Mexico, 1975. El Colegio de México. Illustrations. Bibliography. Index. Pp. 331. Paper.
- Un nuevo enfoque en el indigenismo venezolano.* By EDDIE ROMERO OCANDO. Caracas, 1975. Ministerio de Justicia, Oficina Central de Asuntos Indígenas. Maps. Tables. Diagrams. Pp. 38. Paper.
- Para leer a Neruda.* By HUGO MONTES. Buenos Aires, 1974. Editorial Francisco de Aguirre. Illustrations. Bibliography. Index. Pp. xii, 166. Paper.
- Personality Development in Two Cultures: A Cross Cultural Longitudinal Study of School Children in Mexico and the United States.* By WAYNE H. HOLTZMAN, ROGELIO DÍAZ-GUERRERO, and JON D. SWARTZ. Austin, 1975. University of Texas Press. Tables. Appendices. Bibliography. Index. Pp. xix, 427. Cloth.
- Peruvian Political Perspective.* By MARVIN ALISKY. Tempe, 1975. Arizona State University, Center for Latin American Studies. Tables. Bibliography. Pp. 44. Paper.
- El primer amor. En el campo.* By IVÁN BUNIN. Madrid, 1974. Espasa-Calpe, S. A. Pp. 139. Paper.
- La prima bela.* By HONORATO DE BALZAC. Madrid, 1975. Espasa-Calpe, S. A. Pp. 391. Paper.
- Puerto Rico and the United States, 1917-1933.* By TRUMAN R. CLARK. Pittsburgh, 1975. University of Pittsburgh Press. Notes. Bibliography. Index. Pp. xv, 238. Cloth. \$10.95.
- Puerto Rico: The Case for Independence.* By L. L. CRIPPS. Foreword by GORDON K. LEWIS. Cambridge, Mass., 1974. Schenkman Publishing Co. Map. Bibliography. Pp. xii, 169. Paper. \$5.95.
- Quel socialisme au Chile? Etatisme ou autogestion: Dossier de la participation des travailleurs au processus révolutionnaire du pays.* By MICHAEL RAPTIS. Paris, 1973. Ediciones Anthropos. Pp. 232. Paper.
- Rimas y poemas.* By GUSTAVO ADOLFO BECQUER. Edited by OLIVO LAZZARIN DANTE. Buenos Aires, 1974. Editorial Francisco de Aguirre. Pp. xx, 128. Paper.
- Rompiendo mitos y cadenas de oro: Retorno al movimiento evolucionario renacentista.* By AUGUSTO SANTIS DURAN. Guatemala, 1974. Serviprensa Centroamericana. Tables. Pp. 266. Paper.
- Del saber popular venezolano.* By ANTONIO CARRERA SIBILA. Prologue by GUSTAVO LUIS CARRERA. Cumaná, Venezuela, 1974. Universidad de Oriente. Pp. 281. Paper.
- Sin saber quien eras. Repentino despertar.* By DALIA DIAZ ST. MARIE. Hicksville, New York, 1975. Exposition Press. Pp. 143. Cloth. \$7.00.

- Sixteenth Century North America.* By CARL ORTWIN SAUER. Berkeley, 1975. University of California. Maps. Bibliography. Index. Pp. xii, 319. Paper. \$4.95.
- Sobre autonomía, reforma y política en la universidad central de Venezuela, 1827-1958.* By MANUEL CABALLERO. Caracas, 1974. Universidad Central de Venezuela. Bibliography. Appendix. Pp. 113. Paper.
- Social Movements Violence and Change: The May Movement in Curaçao.* By WILLIAM A. ANDERSON and RUSSELL R. DYNES. Columbus, 1975. Ohio State University Press. Illustrations. Maps. Tables. Appendices. Pp. x, 175. Cloth. \$12.50.
- Soldiers, Indians and Silver: North America's First Frontier War.* By PHILIP WAYNE POWELL. Tempe, 1975. Arizona State University, Center for Latin American Studies. Maps. Notes. Bibliography. Index. Pp. xv, 317. Paper.
- Street Art.* By ROBERT SOMMER. New York, 1975. Links. Photographs. Pp. 65. Paper.
- Studie zur Verbstammvariation im Navaho.* By HEINZ-JÜRGEN PINNOW. Berlin, 1974. Gebr. Mann Verlag. Tables. Bibliography. Pp. xiii, 101. Paper.
- Teatro de la vanguardia: Contemporary Spanish American Theater.* By MYRNA CASAS. Lexington, Mass., 1975. D. C. Heath and Co. Glossary. Pp. 215. Paper. \$5.95.
- U.S. Investment in the Forest-Based Sector in Latin America.* By HANS M. GREGERSEN and ARNALDO CONTRERAS. Baltimore, Md., 1975. Johns Hopkins University Press. Bibliography. Tables. Appendices. Charts. Pp. 113. Paper. \$4.50.
- El viaje de Diogo de Teive Colón y los Portugueses.* By JAIME CORTESAO and A. TEIXEIRA DA MOTA. Valladolid, 1975. La Universidad de Valladolid, Seminario de Historia de América. Cuadernos Colombinos Num. 5. Illustrations. Pp. 63. Paper.
- A Voyage to South America.* By JORGE JUAN and ANTONIO DE ULLOA. Introduction by IRVING LEONARD. Tempe, 1975. Arizona State University, Center for Latin American Studies. Map. Bibliographical Note. Pp. ix, 245. Paper.
- Water Management and Agricultural Development: A Case Study of the Cuyo Region of Argentina.* By KENNETH D. FREDERICK. Foreword by PIERRE R. CROSSON. Baltimore, Md., 1975. Johns Hopkins University Press. Glossary. Tables. Maps. Appendix. Pp. xiv, 187. Cloth.
